# Supplementary material
Source: Springer Nature journal article supplement (https://www.springermedizin.de/resource/supplementary/12943_2013_1286_MOESM6_ESM.pdf/9553148)

**A**

Relative cells migrated

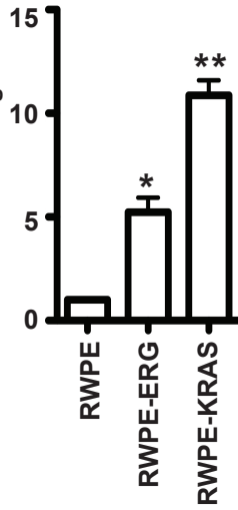**B**

Relative cells migrated

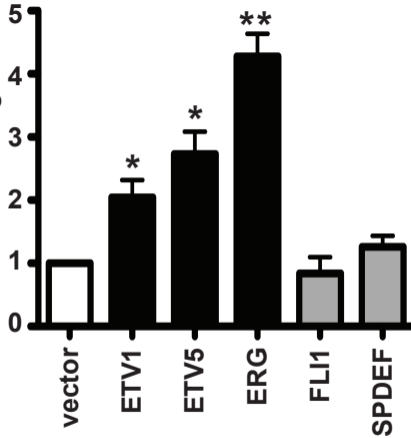**C**

Relative cells migrated

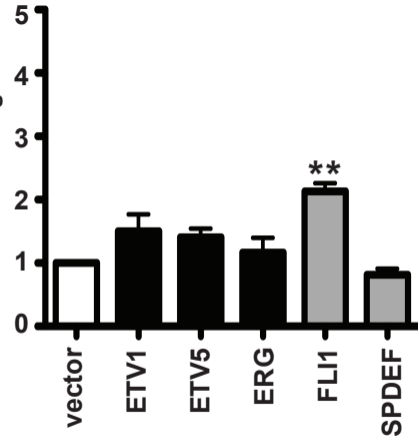

Supplement: MOESM6 [file 9553148]
